# Supplementary material for: Survival comparison between radical surgery and definitive chemoradiation in 267 esophageal squamous cell carcinomas in a single institution: A propensity-matched study
Source: PLoS One. 2017 May 9;12(5):e0177133. doi: 10.1371/journal.pone.0177133 (PMC5423615; doi:10.1371/journal.pone.0177133)
Supplement: S4 Table — (XLSX) [file pone.0177133.s004.xlsx]

## Sheet: S4 Table
Year	Year-HL	Treatment	Tx	Age (yr)	Age-HL	F	Tumor site	Tumor site	Histology	Clinical stage	Clinical stage	cT-stage	cT-HL	cN-stage	cM-stage
2001	Old	Surgery	0	39	Low	F	Ce	High	SqCC	1	Low	1	Low	0	0
2001	Old	Surgery	0	41	Low	F	Ce	High	SqCC	1	Low	1	Low	0	0
2001	Old	Surgery	0	41	Low	F	Ce	High	SqCC	1	Low	1	Low	0	0
2002	Old	Surgery	0	42	Low	F	Ce	High	SqCC	1	Low	1	High	0	0
2002	Old	Surgery	0	45	Low	F	Ce	Low	SqCC	1	Low	1	High	0	0
2002	Old	Surgery	0	46	Low	F	Ce	High	SqCC	1	Low	1	Low	0	0
2002	Old	Surgery	0	46	Low	F	Ce	High	SqCC	1	Low	1	Low	0	0
2002	Old	Surgery	0	46.8137	Low	F	Ce	Low	SqCC	1	Low	1	Low	0	0
2002	Old	Surgery	0	47	Low	F	Ce	High	SqCC	1	Low	1	Low	0	0
2002	Old	Surgery	0	47	Low	F	Ce	High	SqCC	1	Low	1	Low	0	0
2002	Old	Surgery	0	50	Low	F	Ce	High	SqCC	1	High	1	High	0	0
2002	Old	Surgery	0	50	Low	F	Lt	High	SqCC	1	High	1	High	0	0
2002	Old	Surgery	0	50	Low	F	Lt	High	SqCC	1	High	1	High	0	0
2002	Old	Surgery	0	50	Low	F	Lt	High	SqCC	1	High	1	High	0	0
2002	Old	Surgery	0	51	Low	F	Lt	High	SqCC	1	Low	1	High	0	0
2002	Old	Surgery	0	51	Low	F	Lt	High	SqCC	1	Low	1	High	0	0
2002	Old	Surgery	0	51	Low	F	Lt	Low	SqCC	1	High	1	High	0	0
2002	Old	Surgery	0	51	Low	F	Lt	High	SqCC	1	Low	1	Low	0	0
2002	Old	Surgery	0	51.2027	High	F	Lt	High	SqCC	1	Low	1	Low	0	0
2003	Old	Surgery	0	51.2192	Low	F	Lt	Low	SqCC	1	Low	1	Low	0	0
2003	Old	Surgery	0	52	Low	F	Lt	High	SqCC	1	Low	1	Low	0	0
2003	Old	Surgery	0	52	Low	F	Lt	Low	SqCC	1	Low	1	Low	0	0
2003	Old	Surgery	0	52	Low	F	Lt	Low	SqCC	1	High	1	High	0	0
2003	Old	Surgery	0	52	Low	F	Lt	Low	SqCC	1	High	1	High	0	0
2003	Old	Surgery	0	52.5589	Low	F	Lt	High	SqCC	1	Low	1	High	0	0
2003	Old	Surgery	0	53	High	F	Lt	Low	SqCC	1	High	1	High	0	0
2003	Old	Surgery	0	53	High	F	Lt	High	SqCC	1	High	1	High	0	0
2003	Old	Surgery	0	53	High	F	Lt	Low	SqCC	1	High	1	High	0	0
2003	Old	Surgery	0	53	High	F	Lt	Low	SqCC	1	High	1	High	0	0
2003	Old	Surgery	0	53	High	F	Lt	Low	SqCC	1	High	1	High	0	0
2003	Old	Surgery	0	53.3781	High	F	Lt	Low	SqCC	1	High	1	High	0	0
2003	Old	Surgery	0	53.4822	High	F	Lt	Low	SqCC	1	Low	1	Low	0	0
2003	Old	Surgery	0	53.5123	High	F	Lt	High	SqCC	1	High	1	High	0	0
2004	Old	Surgery	0	54	Low	F	Lt	High	SqCC	1	Low	1	Low	0	0
2004	Old	Surgery	0	54	Low	F	Lt	Low	SqCC	1	Low	1	Low	0	0
2004	Old	Surgery	0	54	Low	F	Lt	High	SqCC	1	Low	1	Low	0	0
2004	Old	Surgery	0	54	Low	F	Lt	Low	SqCC	1	Low	1	Low	0	0
2004	Old	Surgery	0	54	Low	F	Lt	Low	SqCC	1	Low	1	Low	0	0
2004	Old	Surgery	0	54	Low	F	Lt	Low	SqCC	1	Low	1	High	0	0
2004	Old	Surgery	0	54	Low	F	Lt	Low	SqCC	1	Low	1	High	0	0
2004	Old	Surgery	0	54.0219	Low	F	Lt	High	SqCC	1	High	1	High	0	0
2004	Old	Surgery	0	54.0548	High	F	Lt	High	SqCC	1	Low	1	High	0	0
2004	Old	Surgery	0	54.3014	High	F	Lt	High	SqCC	1	Low	1	Low	0	0
2005	Old	Surgery	0	55	Low	F	Lt	Low	SqCC	1	Low	1	Low	0	0
2005	Old	Surgery	0	55	Low	F	Lt	High	SqCC	1	Low	1	High	0	0
2005	Old	Surgery	0	55	Low	F	Lt	Low	SqCC	1	Low	1	Low	0	0
2005	Old	Surgery	0	55	Low	F	Lt	High	SqCC	1	Low	1	Low	0	0
2006	Old	Surgery	0	55	Low	F	Lt	High	SqCC	1	Low	1	Low	0	0
2006	Old	Surgery	0	55	Low	F	Lt	Low	SqCC	1	Low	1	Low	0	0
2006	Old	Surgery	0	55.3507	Low	F	Lt	High	SqCC	1	Low	1	Low	0	0
2006	Old	Surgery	0	55.4822	Low	F	Lt	Low	SqCC	1	Low	1	Low	0	0
2006	Old	Surgery	0	55.9342	Low	F	Lt	High	SqCC	1	High	1	High	0	0
2006	Old	Surgery	0	55.9397	Low	F	Lt	Low	SqCC	1	Low	1	Low	0	0
2006	Old	Surgery	0	56	Low	F	Lt	High	SqCC	1	Low	1	High	0	0
2006	Old	Surgery	0	56	Low	M	Lt	Low	SqCC	1	Low	1	Low	0	0
2006	Old	Surgery	0	56	Low	M	Lt	High	SqCC	1	Low	1	Low	0	0
2006	Old	Surgery	0	56	Low	M	Lt	High	SqCC	1	High	1	High	0	0
2006	Old	Surgery	0	56	Low	M	Lt	Low	SqCC	1	High	1	High	0	0
2006	Old	Surgery	0	56	Low	M	Lt	Low	SqCC	1	Low	1	Low	0	0
2006	Old	Surgery	0	56	Low	M	Lt	Low	SqCC	1	Low	1	Low	0	0
2006	Old	Surgery	0	56.137	High	M	Lt	High	SqCC	1	High	1	High	0	0
2006	Old	Surgery	0	56.6274	High	M	Lt	Low	SqCC	1	High	1	High	0	0
2006	Old	Surgery	0	56.6548	High	M	Lt	Low	SqCC	1	High	1	High	0	0
2006	Old	Surgery	0	57	High	M	Lt	Low	SqCC	1	Low	1	High	0	0
2006	Old	Surgery	0	57	High	M	Lt	High	SqCC	1	Low	1	Low	0	0
2006	Old	Surgery	0	57	High	M	Lt	High	SqCC	1	High	1	High	0	0
2006	Old	Surgery	0	57	High	M	Lt	Low	SqCC	1	Low	1	Low	0	0
2006	Old	Surgery	0	57	High	M	Lt	High	SqCC	1	High	1	High	0	0
2007	Old	Surgery	0	57.0274	Low	M	Lt	Low	SqCC	1	High	1	High	0	0
2007	Old	Surgery	0	57.337	Low	M	Lt	High	SqCC	1	High	1	High	0	0
2007	Old	Surgery	0	58	Low	M	Lt	Low	SqCC	1	Low	1	Low	0	0
2007	Old	Surgery	0	58	Low	M	Lt	High	SqCC	1	High	1	High	0	0
2007	Old	Surgery	0	58	Low	M	Lt	High	SqCC	1	High	1	High	0	0
2007	Old	Surgery	0	58	High	M	Lt	Low	SqCC	1	Low	1	Low	0	0
2007	Old	Surgery	0	58	High	M	Lt	High	SqCC	1	Low	1	Low	0	0
2007	Old	Surgery	0	58	High	M	Lt	Low	SqCC	1	Low	1	Low	0	0
2007	Old	Surgery	0	58.4712	High	M	Lt	Low	SqCC	1	High	1	High	0	0
2007	Old	Surgery	0	58.5315	High	M	Lt	Low	SqCC	1	High	1	High	0	0
2007	Old	Surgery	0	58.5534	High	M	Lt	Low	SqCC	1	High	1	High	0	0
2007	Old	Surgery	0	58.5726	High	M	Lt	High	SqCC	1	Low	1	High	0	0
2007	Old	Surgery	0	58.789	High	M	Lt	Low	SqCC	1	Low	1	Low	0	0
2007	Old	Surgery	0	59	High	M	Lt	Low	SqCC	1	Low	1	High	0	0
2007	Old	Surgery	0	59	High	M	Lt	High	SqCC	1	Low	1	High	0	0
2007	Old	Surgery	0	59	High	M	Lt	Low	SqCC	1	Low	1	Low	0	0
2008	Old	Surgery	0	59	Low	M	Lt	Low	SqCC	1	Low	1	High	0	0
2008	Old	Surgery	0	59	Low	M	Lt	Low	SqCC	1	Low	1	Low	0	0
2008	Old	Surgery	0	59	Low	M	Lt	High	SqCC	1	Low	1	Low	0	0
2008	Old	Surgery	0	59	Low	M	Lt	High	SqCC	1	High	1	High	0	0
2008	Old	Surgery	0	59	Low	M	Lt	High	SqCC	1	Low	1	Low	0	0
2008	Old	Surgery	0	59	Low	M	Lt	High	SqCC	1	Low	1	Low	0	0
2008	Old	Surgery	0	59	Low	M	Lt	High	SqCC	1	Low	1	Low	0	0
2008	Old	Surgery	0	59	Low	M	Lt	High	SqCC	1	Low	1	Low	0	0
2008	Old	Surgery	0	59.4685	Low	M	Lt	Low	SqCC	1	Low	1	Low	0	0
2008	Old	Surgery	0	59.9918	Low	M	Lt	Low	SqCC	1	High	1	High	0	0
2008	Old	Surgery	0	60	Low	M	Lt	Low	SqCC	1	Low	1	High	0	0
2008	Old	Surgery	0	60	Low	M	Lt	High	SqCC	1	Low	1	Low	0	0
2008	Old	Surgery	0	60	Low	M	Lt	High	SqCC	1	Low	1	Low	0	0
2008	Old	Surgery	0	60	Low	M	Lt	Low	SqCC	1	High	1	High	0	0
2008	Old	Surgery	0	60	High	M	Lt	Low	SqCC	1	Low	1	High	0	0
2008	Old	Surgery	0	60	High	M	Lt	Low	SqCC	2	Low	1	Low	0	0
2008	Old	Surgery	0	60	High	M	Lt	High	SqCC	2	High	1	High	0	0
2008	Old	Surgery	0	60	High	M	Lt	Low	SqCC	2	High	1	High	0	0
2008	Old	Surgery	0	60	High	M	Lt	High	SqCC	2	Low	1	Low	0	0
2008	Old	Surgery	0	60	High	M	Lt	High	SqCC	2	Low	1	Low	0	0
2008	Old	Surgery	0	60	High	M	Lt	High	SqCC	2	Low	1	Low	0	0
2008	Old	Surgery	0	60	High	M	Lt	Low	SqCC	2	High	1	High	0	0
2008	Old	Surgery	0	60.0932	High	M	Lt	Low	SqCC	2	Low	1	Low	0	0
2008	Old	Surgery	0	61	High	M	Lt	Low	SqCC	2	Low	1	Low	0	0
2008	Old	Surgery	0	61	High	M	Lt	High	SqCC	2	Low	1	Low	0	0
2008	Old	Surgery	0	61	High	M	Lt	Low	SqCC	2	Low	1	High	0	0
2008	Old	Surgery	0	61	High	M	Lt	High	SqCC	2	High	1	High	0	0
2008	Old	Surgery	0	61	High	M	Lt	Low	SqCC	2	High	1	High	0	0
2008	Old	Surgery	0	61	High	M	Lt	High	SqCC	2	High	1	High	0	0
2008	Old	Surgery	0	61	High	M	Lt	High	SqCC	2	Low	1	High	0	0
2009	Old	Surgery	0	61	Low	M	Lt	High	SqCC	2	Low	1	Low	0	0
2009	Old	Surgery	0	61	Low	M	Lt	High	SqCC	2	Low	1	Low	0	0
2009	Old	Surgery	0	61	Low	M	Lt	High	SqCC	2	Low	1	Low	0	0
2009	Old	Surgery	0	61	Low	M	Lt	High	SqCC	2	Low	1	High	0	0
2009	Old	Surgery	0	61	Low	M	Lt	High	SqCC	2	Low	1	Low	0	0
2009	Old	Surgery	0	61	Low	M	Lt	High	SqCC	2	High	1	High	0	0
2009	Old	Surgery	0	61.0055	Low	M	Lt	Low	SqCC	2	Low	1	Low	0	0
2009	Old	Surgery	0	62	Low	M	Lt	High	SqCC	2	Low	1	Low	0	0
2009	Old	Surgery	0	62	Low	M	Lt	High	SqCC	2	Low	1	Low	0	0
2009	Old	Surgery	0	62	Low	M	Lt	Low	SqCC	2	High	1	High	0	0
2009	Old	Surgery	0	62	Low	M	Lt	High	SqCC	2	High	1	High	0	0
2009	Old	Surgery	0	62	Low	M	Lt	High	SqCC	2	Low	1	Low	0	0
2009	Old	Surgery	0	62	Low	M	Lt	Low	SqCC	2	Low	1	High	0	0
2009	Old	Surgery	0	62	Low	M	Lt	Low	SqCC	2	High	1	High	0	0
2009	Old	Surgery	0	62	Low	M	Lt	Low	SqCC	2	Low	1	Low	0	0
2009	Old	Surgery	0	62	Low	M	Lt	Low	SqCC	2	Low	1	Low	0	0
2009	Old	Surgery	0	62	Low	M	Lt	High	SqCC	2	Low	1	High	0	0
2009	Old	Surgery	0	62	Low	M	Lt	High	SqCC	2	Low	1	Low	0	0
2009	Old	Surgery	0	62	Low	M	Lt	High	SqCC	2	Low	1	High	0	0
2009	Old	Surgery	0	62	Low	M	Lt	Low	SqCC	2	High	1	High	0	0
2009	Old	Surgery	0	62	Low	M	Lt	Low	SqCC	2	High	1	High	0	0
2009	Old	Surgery	0	62.2082	Low	M	Lt	Low	SqCC	2	Low	1	Low	0	0
2009	Old	Surgery	0	62.2247	Low	M	Lt	High	SqCC	2	Low	1	Low	0	0
2009	Old	Surgery	0	62.3014	Low	M	Lt	Low	SqCC	2	Low	1	High	0	0
2009	Old	Surgery	0	62.4712	High	M	Lt	High	SqCC	2	Low	1	Low	0	0
2009	Old	Surgery	0	63	High	M	Lt	Low	SqCC	2	High	1	High	0	0
2009	Old	Surgery	0	63	High	M	Lt	High	SqCC	2	High	1	High	0	0
2009	Old	Surgery	0	63	High	M	Lt	Low	SqCC	2	High	1	High	0	0
2009	Old	Surgery	0	63	High	M	Lt	Low	SqCC	2	High	2	High	0	0
2009	Old	Surgery	0	63	High	M	Lt	High	SqCC	2	Low	2	Low	0	0
2009	Old	Surgery	0	63	High	M	Lt	High	SqCC	2	High	2	High	0	0
2009	Old	Surgery	0	63	High	M	Lt	High	SqCC	2	Low	2	Low	0	0
2009	Old	Surgery	0	63	High	M	Lt	High	SqCC	2	Low	2	Low	0	0
2009	Old	Surgery	0	63	High	M	Lt	High	SqCC	2	Low	2	Low	0	0
2009	Old	Surgery	0	63	High	M	Lt	High	SqCC	2	Low	2	Low	0	0
2009	Old	Surgery	0	63	High	M	Lt	Low	SqCC	2	High	2	High	0	0
2009	Old	Surgery	0	63	High	M	Lt	High	SqCC	2	Low	2	High	0	0
2010	Old	Surgery	0	63	Low	M	Lt	High	SqCC	2	Low	2	High	0	0
2010	Old	Surgery	0	63	Low	M	Lt	High	SqCC	2	Low	2	Low	0	0
2010	Old	Surgery	0	63	Low	M	Lt	High	SqCC	2	Low	2	Low	0	0
2010	Old	Surgery	0	63	Low	M	Lt	High	SqCC	2	Low	2	High	0	0
2010	Old	Surgery	0	63	Low	M	Lt	High	SqCC	2	Low	2	Low	0	0
2010	Old	Surgery	0	63	Low	M	Lt	High	SqCC	2	Low	2	Low	0	0
2010	Old	Surgery	0	63.2329	Low	M	Lt	High	SqCC	2	Low	2	Low	0	0
2010	Old	Surgery	0	63.8192	Low	M	Lt	Low	SqCC	2	Low	2	High	0	0
2010	Old	Surgery	0	64	Low	M	Lt	Low	SqCC	2	Low	2	High	0	0
2010	Old	Surgery	0	64	Low	M	Mt	High	SqCC	2	High	2	High	0	0
2010	Old	Surgery	0	64	Low	M	Mt	Low	SqCC	2	Low	2	Low	0	0
2010	Old	Surgery	0	64	Low	M	Mt	High	SqCC	2	Low	2	Low	0	0
2010	Old	Surgery	0	64	Low	M	Mt	Low	SqCC	2	Low	2	Low	0	0
2010	Old	Surgery	0	64	Low	M	Mt	Low	SqCC	2	Low	2	Low	0	0
2010	Old	Surgery	0	64	Low	M	Mt	High	SqCC	2	Low	2	Low	0	0
2010	Old	Surgery	0	65	Low	M	Mt	High	SqCC	2	Low	2	Low	0	0
2010	Old	Surgery	0	65	Low	M	Mt	Low	SqCC	2	Low	2	High	1	0
2010	Old	Surgery	0	65	Low	M	Mt	High	SqCC	2	Low	2	Low	1	0
2010	Old	Surgery	0	65	Low	M	Mt	High	SqCC	2	Low	2	Low	1	0
2010	Old	Surgery	0	65	Low	M	Mt	Low	SqCC	2	Low	2	Low	1	0
2010	Old	Surgery	0	65	Low	M	Mt	Low	SqCC	2	High	2	High	1	0
2010	Old	Surgery	0	65	Low	M	Mt	High	SqCC	2	High	2	High	1	0
2010	Old	Surgery	0	65.2822	Low	M	Mt	High	SqCC	2	High	2	High	1	0
2010	Old	Surgery	0	66	Low	M	Mt	High	SqCC	2	Low	2	Low	1	0
2010	Old	Surgery	0	66	High	M	Mt	Low	SqCC	2	Low	2	Low	1	0
2010	Old	Surgery	0	66	High	M	Mt	High	SqCC	2	High	2	High	1	0
2010	Old	Surgery	0	66	High	M	Mt	High	SqCC	2	High	2	High	1	0
2010	Old	Surgery	0	66	High	M	Mt	High	SqCC	2	Low	2	Low	1	0
2010	Old	Surgery	0	66	High	M	Mt	Low	SqCC	2	High	2	High	1	0
2010	Old	Surgery	0	66	High	M	Mt	High	SqCC	2	Low	2	Low	1	0
2010	Old	Surgery	0	66	High	M	Mt	Low	SqCC	2	High	2	High	1	0
2010	Old	Surgery	0	66	High	M	Mt	Low	SqCC	2	High	2	High	1	0
2010	Old	Surgery	0	66	High	M	Mt	Low	SqCC	2	High	2	High	1	0
2010	Old	Surgery	0	66	High	M	Mt	High	SqCC	2	Low	2	Low	1	0
2010	Old	Surgery	0	66	High	M	Mt	Low	SqCC	2	High	2	High	1	0
2010	Old	Surgery	0	66	High	M	Mt	High	SqCC	2	Low	2	Low	1	0
2010	Old	Surgery	0	66	High	M	Mt	High	SqCC	2	Low	2	Low	1	0
2010	Old	Surgery	0	66	High	M	Mt	High	SqCC	2	Low	2	Low	1	0
2010	Old	Surgery	0	66	High	M	Mt	Low	SqCC	2	Low	2	High	1	0
2010	Old	Surgery	0	66	High	M	Mt	High	SqCC	2	High	2	High	1	0
2011	New	Surgery	0	66	Low	M	Mt	Low	SqCC	2	Low	2	Low	1	0
2011	New	Surgery	0	66	Low	M	Mt	High	SqCC	2	Low	2	Low	1	0
2011	New	Surgery	0	66.0356	Low	M	Mt	High	SqCC	2	Low	3	Low	1	0
2011	New	Surgery	0	66.1425	Low	M	Mt	Low	SqCC	2	Low	3	Low	1	0
2011	New	Surgery	0	67	Low	M	Mt	High	SqCC	2	Low	3	Low	1	0
2011	New	Surgery	0	67	Low	M	Mt	High	SqCC	2	Low	3	Low	1	0
2011	New	Surgery	0	67	Low	M	Mt	High	SqCC	2	Low	3	Low	1	0
2011	New	Surgery	0	67	Low	M	Mt	High	SqCC	2	Low	3	Low	1	0
2011	New	Surgery	0	67	Low	M	Mt	Low	SqCC	2	Low	3	Low	1	0
2011	New	Surgery	0	67	Low	M	Mt	High	SqCC	2	Low	3	High	1	0
2011	New	Surgery	0	67	Low	M	Mt	High	SqCC	2	Low	3	Low	1	0
2011	New	Surgery	0	67	Low	M	Mt	High	SqCC	2	Low	3	Low	1	0
2011	New	Surgery	0	67	Low	M	Mt	High	SqCC	2	Low	3	Low	1	0
2011	New	Surgery	0	67	Low	M	Mt	Low	SqCC	2	Low	3	High	1	0
2011	New	Surgery	0	67.3178	Low	M	Mt	High	SqCC	2	Low	3	Low	1	0
2011	New	Surgery	0	68	Low	M	Mt	High	SqCC	2	Low	3	Low	1	0
2011	New	Surgery	0	68	Low	M	Mt	Low	SqCC	2	Low	3	Low	1	0
2011	New	Surgery	0	68	Low	M	Mt	Low	SqCC	2	Low	3	Low	1	0
2011	New	Surgery	0	68	Low	M	Mt	Low	SqCC	2	Low	3	Low	1	0
2011	New	Surgery	0	68	Low	M	Mt	High	SqCC	2	Low	3	Low	1	0
2011	New	Surgery	0	68	High	M	Mt	Low	SqCC	2	Low	3	Low	1	0
2011	New	Surgery	0	68	High	M	Mt	Low	SqCC	2	Low	3	Low	1	0
2011	New	Surgery	0	68	High	M	Mt	High	SqCC	2	High	3	High	1	0
2011	New	Surgery	0	68	High	M	Mt	High	SqCC	2	Low	3	Low	1	0
2011	New	Surgery	0	68	High	M	Mt	High	SqCC	2	Low	3	Low	1	0
2011	New	Surgery	0	68	High	M	Mt	Low	SqCC	2	Low	3	Low	1	0
2011	New	Surgery	0	68	High	M	Mt	High	SqCC	2	Low	3	Low	1	0
2011	New	Surgery	0	68	High	M	Mt	High	SqCC	2	Low	3	High	1	0
2011	New	Surgery	0	68	High	M	Mt	High	SqCC	2	Low	3	Low	1	0
2011	New	Surgery	0	68	High	M	Mt	High	SqCC	2	Low	3	Low	1	0
2011	New	Surgery	0	68	High	M	Mt	High	SqCC	2	High	3	High	1	0
2011	New	Surgery	0	68.0027	High	M	Mt	High	SqCC	2	High	3	High	1	0
2011	New	Surgery	0	69	High	M	Mt	Low	SqCC	2	High	3	High	1	0
2011	New	Surgery	0	69	High	M	Mt	High	SqCC	2	High	3	High	1	0
2011	New	Surgery	0	69	High	M	Mt	Low	SqCC	2	Low	3	High	1	0
2011	New	Surgery	0	69	High	M	Mt	High	SqCC	2	High	3	High	1	0
2011	New	Surgery	0	69	High	M	Mt	High	SqCC	2	High	3	High	1	0
2011	New	Surgery	0	69	High	M	Mt	High	SqCC	2	High	3	High	1	0
2011	New	Surgery	0	69	High	M	Mt	Low	SqCC	2	Low	3	Low	1	0
2012	New	Surgery	0	69	Low	M	Mt	High	SqCC	2	Low	3	High	1	0
2012	New	Surgery	0	69	Low	M	Mt	Low	SqCC	2	Low	3	Low	1	0	138
2012	New	Surgery	0	70	Low	M	Mt	High	SqCC	2	Low	3	Low	1	0
2012	New	Surgery	0	70	Low	M	Mt	High	SqCC	2	Low	3	Low	1	0
2012	New	Surgery	0	70	Low	M	Mt	High	SqCC	2	Low	3	Low	1	0
2012	New	Surgery	0	70	Low	M	Mt	High	SqCC	2	Low	3	High	1	0
2012	New	Surgery	0	70	Low	M	Mt	High	SqCC	2	High	3	High	1	0
2012	New	Surgery	0	70	Low	M	Mt	Low	SqCC	2	Low	3	Low	1	0
2012	New	Surgery	0	70	Low	M	Mt	Low	SqCC	2	Low	3	Low	1	0
2012	New	Surgery	0	70	Low	M	Mt	Low	SqCC	2	Low	3	Low	1	0
2012	New	Surgery	0	70	Low	M	Mt	Low	SqCC	2	Low	3	Low	1	0
2012	New	Surgery	0	70	Low	M	Mt	Low	SqCC	2	Low	3	Low	1	0
2012	New	Surgery	0	70	Low	M	Mt	High	SqCC	2	Low	3	Low	1	0
2012	New	Surgery	0	70	Low	M	Mt	High	SqCC	3	High	3	High	1	0
2012	New	Surgery	0	70	Low	M	Mt	High	SqCC	3	Low	3	Low	1	0
2012	New	Surgery	0	70	Low	M	Mt	High	SqCC	3	High	3	High	1	0
2012	New	Surgery	0	70	Low	M	Mt	Low	SqCC	3	Low	3	Low	1	0
2012	New	Surgery	0	70	Low	M	Mt	Low	SqCC	3	High	3	High	1	0
2012	New	Surgery	0	70.2192	Low	M	Mt	High	SqCC	3	High	3	High	1	0
2012	New	Surgery	0	71	Low	M	Mt	High	SqCC	3	High	3	High	1	0
2012	New	Surgery	0	71	High	M	Mt	Low	SqCC	3	Low	3	Low	1	0
2012	New	Surgery	0	71	High	M	Mt	Low	SqCC	3	Low	3	High	1	0
2012	New	Surgery	0	71	High	M	Mt	Low	SqCC	3	Low	3	Low	1	0
2012	New	Surgery	0	71	High	M	Mt	High	SqCC	3	Low	3	Low	1	0
2012	New	Surgery	0	71	High	M	Mt	High	SqCC	3	Low	3	Low	1	0
2012	New	Surgery	0	71	High	M	Mt	Low	SqCC	3	High	3	High	1	0
2012	New	Surgery	0	71	High	M	Mt	Low	SqCC	3	High	3	High	1	0
2012	New	Surgery	0	71	High	M	Mt	High	SqCC	3	Low	3	Low	1	0
2012	New	Surgery	0	71	High	M	Mt	Low	SqCC	3	Low	3	Low	1	0
2012	New	Surgery	0	71	High	M	Mt	Low	SqCC	3	Low	3	High	1	0
2012	New	Surgery	0	71	High	M	Mt	High	SqCC	3	Low	3	Low	1	0
2012	New	Surgery	0	71	High	M	Mt	High	SqCC	3	Low	3	Low	1	0
2012	New	Surgery	0	71	High	M	Mt	High	SqCC	3	Low	3	Low	1	0
2012	New	Surgery	0	71	High	M	Mt	Low	SqCC	3	Low	3	Low	1	0
2012	New	Surgery	0	71	High	M	Mt	High	SqCC	3	Low	3	Low	1	0
2012	New	Surgery	0	71	High	M	Mt	Low	SqCC	3	High	3	High	1	0
2012	New	Surgery	0	71	High	M	Mt	Low	SqCC	3	Low	3	Low	1	0
2012	New	Surgery	0	71	High	M	Mt	High	SqCC	3	Low	3	Low	1	0
2012	New	Surgery	0	71.1781	High	M	Mt	High	SqCC	3	High	3	High	1	0
2013	New	Surgery	0	71.589	Low	M	Mt	High	SqCC	3	Low	3	Low	1	0
2013	New	Surgery	0	72	Low	M	Mt	Low	SqCC	3	High	3	High	1	0
2013	New	Surgery	0	72	Low	M	Mt	Low	SqCC	3	Low	3	Low	1	0
2013	New	Surgery	0	72	Low	M	Mt	High	SqCC	3	High	3	High	1	0
2013	New	Surgery	0	72	Low	M	Mt	High	SqCC	3	Low	3	Low	1	0
2013	New	Surgery	0	72	Low	M	Mt	Low	SqCC	3	Low	3	Low	1	0
2013	New	Surgery	0	72	Low	M	Mt	Low	SqCC	3	High	3	High	1	0
2013	New	Surgery	0	72	Low	M	Mt	Low	SqCC	3	High	3	High	1	0
2013	New	Surgery	0	72	Low	M	Mt	High	SqCC	3	Low	3	Low	1	0
2013	New	Surgery	0	72	Low	M	Mt	Low	SqCC	3	Low	3	Low	1	0
2013	New	Surgery	0	72.789	Low	M	Mt	High	SqCC	3	Low	3	Low	1	0
2013	New	Surgery	0	73	Low	M	Mt	Low	SqCC	3	Low	3	Low	1	0
2013	New	Surgery	0	73	Low	M	Mt	High	SqCC	3	Low	3	Low	1	0
2013	New	Surgery	0	73	Low	M	Mt	Low	SqCC	3	High	3	High	1	0
2013	New	Surgery	0	73	Low	M	Mt	High	SqCC	3	High	3	High	1	0
2013	New	Surgery	0	73	Low	M	Mt	Low	SqCC	3	Low	3	Low	1	0
2013	New	Surgery	0	73	Low	M	Mt	Low	SqCC	3	High	3	High	1	0
2013	New	Surgery	0	73	Low	M	Mt	Low	SqCC	3	High	3	High	1	0
2013	New	Surgery	0	73	Low	M	Mt	Low	SqCC	3	High	3	High	1	0
2013	New	Surgery	0	73	High	M	Mt	Low	SqCC	3	High	3	High	1	0
2013	New	Surgery	0	73	High	M	Mt	Low	SqCC	3	Low	3	Low	1	0
2013	New	Surgery	0	73	High	M	Mt	Low	SqCC	3	Low	3	Low	1	0
2013	New	Surgery	0	73	High	M	Mt	High	SqCC	3	High	3	High	1	0
2013	New	Surgery	0	73	High	M	Mt	Low	SqCC	3	High	3	High	1	0
2013	New	Surgery	0	73	High	M	Mt	High	SqCC	3	High	3	High	1	0
2013	New	Surgery	0	73	High	M	Mt	Low	SqCC	3	Low	3	Low	1	0
2013	New	Surgery	0	73.0356	High	M	Mt	Low	SqCC	3	High	3	High	1	0
2013	New	Surgery	0	73.3288	High	M	Mt	Low	SqCC	3	Low	3	Low	1	0
2013	New	Surgery	0	74	High	M	Mt	Low	SqCC	3	Low	3	Low	1	0
2013	New	Surgery	0	74	High	M	Mt	Low	SqCC	3	Low	3	High	1	0
2013	New	Surgery	0	74	High	M	Mt	Low	SqCC	3	Low	3	High	1	0
2013	New	Surgery	0	74	High	M	Mt	High	SqCC	3	Low	3	Low	1	0
2013	New	Surgery	0	74	High	M	Mt	Low	SqCC	3	Low	3	Low	1	0
2013	New	Surgery	0	74	High	M	Mt	High	SqCC	3	High	3	High	1	0
2013	New	Surgery	0	74	High	M	Ut	High	SqCC	3	High	3	High	1	0
2013	New	Surgery	0	74	High	M	Ut	High	SqCC	3	High	3	High	1	0
2013	New	Surgery	0	74	High	M	Ut	Low	SqCC	3	High	3	High	1	0
2013	New	Surgery	0	74.0301	High	M	Ut	Low	SqCC	3	High	3	High	1	0
2013	New	Surgery	0	74.9342	High	M	Ut	High	SqCC	3	High	3	High	1	0
2013	New	Surgery	0	75	High	M	Ut	Low	SqCC	3	Low	3	Low	1	0
2013	New	Surgery	0	75	High	M	Ut	High	SqCC	3	High	3	High	1	0
2013	New	Surgery	0	75	High	M	Ut	High	SqCC	3	Low	3	Low	1	0
2013	New	Surgery	0	75	High	M	Ut	High	SqCC	3	Low	3	Low	1	0
2013	New	Surgery	0	75	High	M	Ut	Low	SqCC	3	Low	3	High	1	0
2013	New	Surgery	0	75	High	M	Ut	High	SqCC	3	Low	3	Low	1	0
2013	New	Surgery	0	75	High	M	Ut	High	SqCC	3	Low	3	Low	1	0
2014	New	Surgery	0	75	Low	M	Ut	Low	SqCC	3	Low	3	Low	1	0
2014	New	Surgery	0	75	Low	M	Ut	High	SqCC	3	High	3	High	1	0
2014	New	Surgery	0	75	Low	M	Ut	Low	SqCC	3	Low	3	High	1	0
2014	New	Surgery	0	75	Low	M	Ut	Low	SqCC	3	High	3	High	1	0
2014	New	Surgery	0	76	Low	M	Ut	High	SqCC	3	Low	3	High	1	0
2014	New	Surgery	0	76	Low	M	Ut	High	SqCC	3	Low	3	Low	1	0
2014	New	Surgery	0	76	Low	M	Ut	High	SqCC	3	High	3	High	1	0
2014	New	Surgery	0	76	Low	M	Ut	High	SqCC	3	Low	3	Low	1	0
2014	New	Surgery	0	76	Low	M	Ut	High	SqCC	3	Low	3	Low	1	0
2014	New	Surgery	0	76	Low	M	Ut	High	SqCC	3	Low	3	Low	1	0
2014	New	Surgery	0	77	Low	M	Ut	High	SqCC	3	High	3	High	1	0
2014	New	Surgery	0	77	Low	M	Ut	Low	SqCC	3	High	3	High	1	0
2014	New	Surgery	0	77	Low	M	Ut	High	SqCC	3	Low	3	Low	1	0
2014	New	Surgery	0	77.1288	Low	M	Ut	High	SqCC	3	Low	3	High	1	0
2014	New	Surgery	0	78	Low	M	Ut	High	SqCC	3	Low	3	Low	1	0
2014	New	Surgery	0	79	Low	M	Ut	High	SqCC	3	High	3	High	1	0
2014	New	Surgery	0	79	Low	M	Ut	High	SqCC	3	Low	3	Low	1	0
2014	New	Surgery	0	79	Low	M	Ut	High	SqCC	3	Low	3	Low	1	0
2014	New	Surgery	0	79	Low	M	Ut	High	SqCC	3	Low	3	Low	1	0
2014	New	Surgery	0	79	Low	M	Ut	High	SqCC	3	Low	3	Low	1	0
2014	New	Surgery	0	79	High	M	Ut	High	SqCC	3	Low	3	Low	1	0
2014	New	Surgery	0	79	High	M	Ut	High	SqCC	3	Low	3	Low	1	0	105
2014	New	Surgery	0	80	High	M	Ut	High	SqCC	3	Low	3	Low	1	0
2014	New	Surgery	0	80	High	M	Ut	High	SqCC	3	Low	3	High	1	0
2014	New	Surgery	0	80	High	M	Ut	High	SqCC	3	Low	3	Low	1	0
2014	New	Surgery	0	80	High	M	Ut	Low	SqCC	3	Low	3	High	1	0
2014	New	Surgery	0	80	High	M	Ut	High	SqCC	3	High	3	High	1	0
2014	New	Surgery	0	81	High	M	Ut	High	SqCC	3	Low	3	Low	1	0
2014	New	Surgery	0	81	High	M	Ut	High	SqCC	3	Low	3	Low	1	0
2014	New	Surgery	0	81.6219	High	M	Ut	High	SqCC	3	Low	3	Low	1	0
2014	New	Surgery	0	82	High	M	Ut	Low	SqCC	3	Low	3	Low	1	0
2014	New	Surgery	0	82	High	M	Ut	Low	SqCC	3	High	3	High	1	0
2014	New	Surgery	0	82	High	M	Ut	High	SqCC	3	Low	3	High	1	0
2014	New	Surgery	0	82	High	M	Ut	High	SqCC	3	Low	3	Low	1	0
2014	New	Surgery	0	83	High	M	Ut	High	SqCC	3	Low	3	Low	1	0
2014	New	Surgery	0	83	High	M	Ut	High	SqCC	3	Low	3	High	1	0
2014	New	Surgery	0	85	High	M	Ut	High	SqCC	3	Low	3	High	1	0
2014	New	Surgery	0	85	High	M	Ut	High	SqCC	3	Low	3	Low	1	0
2014	New	Surgery	0	86	High	M	Ut	High	SqCC	3	High	3	High	1	0
2014	New	Surgery	0	92	High	Sex	Ut	High	SqCC	3	High	3	High	1	0	18
										112		162		188
